# Aperiodic brain activity and response to anesthesia vary in disorders of consciousness

Charlotte Maschke <sup>a,b</sup>, Catherine Duclos <sup>c,d</sup>, Adrian M. Owen <sup>e,f,g</sup>, Karim Jerbi <sup>h,i</sup>, Stefanie Blain-Moraes <sup>a,j</sup>

a) Montreal General Hospital, McGill University Health Centre, Montreal, Canada

b) Integrated Program in Neuroscience, McGill University, Montreal, Canada

c) Hôpital du Sacré-Cœur de Montréal, Centre intégré universitaire de Santé et de Services Sociaux du Nord-de-l'île-de-Montréal, Montréal, Québec Canada

d) Department of Anesthesiology and Pain Medicine, Université de Montréal, Montréal, Québec Canada

e) Department of Physiology and Pharmacology, Western University, London, Ontario, Canada

f) Western Institute for Neuroscience, Western University, London, Ontario, Canada

g) Department of Psychology, Western University, London, Ontario, Canada

h) Cognitive & Computational Neuroscience Lab, Psychology Department, University of Montreal, Québec, Canada, MILA (Québec Artificial Intelligence Institute), Montréal, Québec, Canada,

i) Centre UNIQUE (Union Neurosciences & Intelligence Artificielle), Montréal, Québec, Canada

j) School of Physical and Occupational Therapy, McGill University, Montreal, Canada

\* Stefanie Blain-Moraes

**Email:** [stefanie.blain-moraes@mcgill.ca](mailto:stefanie.blain-moraes@mcgill.ca)

**Author Contributions:** C.M., C.D., K.J. and S.B.M. designed research; C.M. and D.C. performed analysis; AM.O. provided data; C.M. wrote the paper, C.D. AM.O. and S.B.M. and K.J. provided feedback.

**Competing Interest Statement:** None

**Keywords:** disorders of consciousness, anesthesia, aperiodic component, electroencephalogram

**This PDF file includes:**

Main Text  
Figures 1 to 3  
Table 1

## 2 Abstract

3 In the human electroencephalogram (EEG), oscillatory power peaks co-exist with non-oscillatory,  
4 aperiodic activity. Although EEG analysis has traditionally focused exclusively on oscillatory power,  
5 recent investigations have shown that the aperiodic EEG component can distinguish conscious  
6 wakefulness from sleep and anesthetic-induced unconsciousness (Lendner et al. 2020). This study  
7 investigates the aperiodic EEG component of individuals in a disorder of consciousness (DOC),  
8 and how it changes in response to exposure to anesthesia. High-density EEG was recorded from  
9 43 individuals in a DOC. To measure the brain's reaction to global perturbation, a subset of  $n = 16$   
10 were also exposed to a targeted infusion of propofol anesthesia. The aperiodic component was  
11 defined by the spectral slope and offset in the 1-45 Hz and 30-45 Hz range of the power spectral  
12 density. Brain network criticality and complexity were estimated using the pair correlation function  
13 (PCF) and Lempel-Ziv complexity, respectively. The level of responsiveness of all individuals in  
14 DOC was assessed using the Coma Recovery Scale-Revised (CRS-R). Recovery of  
15 consciousness was assessed three months post-EEG. At baseline, the EEG aperiodic component  
16 was more strongly correlated to the participants' level of consciousness than the oscillatory  
17 component. Anesthesia caused a steepening of the spectral slope across participants. Importantly,  
18 the change in spectral slope positively correlated with the individual participant's level of  
19 responsiveness. The spectral slope during exposure to anesthesia contained prognostic value for  
20 individuals with DOC. The anesthetic-induced change in aperiodic EEG was accompanied by loss  
21 of information-richness and a reduction in network criticality. The aperiodic EEG component in  
22 individuals with DOC has been historically neglected; this research highlights the importance of  
23 considering this measure for future research investigating brain mechanisms underlying  
24 consciousness.

## 25 Significance Statement

26 The analysis of human EEG has traditionally focused on oscillatory power, which is characterized  
27 by peaks above a broadband, aperiodic component in the EEG power spectral density. This study  
28 is the first to demonstrate the value of the aperiodic EEG component and specifically, its reaction  
29 to propofol anesthesia for assessing individual's level of, and capacity for, consciousness. Our  
30 results demonstrates that the pharmacological induced change in the aperiodic component  
31 accompanies the brain's loss of network criticality and complexity. Most importantly, the magnitude  
32 of brain response to propofol anesthesia relies on an individual's pre-anesthetic level of  
33 consciousness. Whereas the aperiodic EEG component has been historically neglected; this  
34 research highlights the necessity of considering this measure for future research that seeks to  
35 understand the neurophysiological underpinnings of consciousness.

## 36 Introduction

37 Are there signatures in human brain activity that can be used to delineate an individual's level of  
38 consciousness? During conscious wakefulness, the brain has been widely suggested to operate  
39 close to criticality — a point where the underlying network is poised between order and disorder  
40 (1–4, see 5 as a review). This balance is putatively maintained by a proper tuning between  
41 excitation and inhibition (E/I) (6, 7). Divergence from this balance has been proposed as a  
42 mechanism underlying pharmacologically induced and pathological loss of consciousness (4, 8, 9).  
43 This is a promising theoretical framework for the assessment of consciousness, especially in  
44 individuals who are behaviorally unresponsive (4, 10, 11).

45 Individuals in disorders of consciousness (DOC) following brain injury exhibit a wide range of  
46 reduced levels of awareness and arousal. As consciousness and responsiveness can be  
47 completely dissociated (12–14), the identification of behavior-independent measures of  
48 consciousness is crucial for improving clinical practice and for uncovering the mechanisms of  
49 human consciousness. Electroencephalography (EEG) is a particularly promising tool for assessing

50 the level of consciousness of individuals in a DOC, as it is highly accessible in the clinical setting,  
51 has few patient contraindications and can be recorded at the bedside (15).

52 To quantify levels of consciousness, the analysis of human EEG has traditionally focused on  
53 oscillatory patterns within specific frequency bands, which are defined by peaks in the power-  
54 spectral density (PSD) of the human EEG. However, oscillatory peaks always co-occur with  
55 broadband non-oscillatory (i.e. aperiodic) activity, which can be described by the exponential (i.e.  
56 1/f-like) decay of power over frequency (16, 17). Recent advances in electrophysiology (16, 17)  
57 suggest that analyzing EEG data solely from the perspective of oscillatory patterns may lead to  
58 incomplete representations of the underlying neurophysiological processes.

59 Although the PSD of healthy adult EEG is characterized by the presence of spectral peaks --  
60 predominantly in the theta and alpha bandwidth -- the PSD of individuals in DOC often exhibits a  
61 total absence of such peaks (see Fig 1A). Interpreting the remaining power of the aperiodic  
62 component erroneously as being oscillatory leads to several significant methodological problems  
63 (17), given that the periodic and aperiodic component may vary independently. When not  
64 considered separately, putative changes in EEG oscillations across tasks and conditions might be  
65 underpinned entirely by alterations in the aperiodic component of the EEG. Thus, investigating the  
66 aperiodic component in the EEG of individuals in DOC might also lead to more complete  
67 representations of the neurophysiological underpinnings of consciousness.

68 Additionally, recent studies have shown that the properties of the aperiodic EEG contain information  
69 about consciousness, which are neglected in traditional oscillation-based analyses (10, 11). The  
70 aperiodic EEG and has been linked to the local E/I balance (18–20) and divergence from criticality  
71 (4). Being correlated to established consciousness metrics, such as the Perturbation Complexity  
72 Index (10, 21) and signal complexity (20), the aperiodic component has shown much promise for  
73 the investigation of mechanisms underlying consciousness. States of unconsciousness, such as  
74 non-rapid eye movement sleep (11) and anesthetic-induced unconsciousness (10, 11) exhibit a  
75 steeper spectral slope (i.e. a faster power decay over frequencies), compared to wakefulness.  
76 Changes in the aperiodic EEG were further observed after exposure to psychoactive drugs (18,  
77 22). As such, the aperiodic component has been widely proposed for the assessment of individuals  
78 in a DOC (7, 8).

79 Using EEG recorded under various conditions of pharmacologically and pathologically induced  
80 unconsciousness, this study aimed to characterize the aperiodic component associated with  
81 consciousness for individuals in DOC, and in particular, how this component changes in response  
82 to exposure to anesthesia. General anesthesia is known to reliably reduce levels of consciousness  
83 *and* responsiveness by globally perturbing brain networks underlying consciousness (23).  
84 Investigating the anesthetic-induced change of the aperiodic component in individuals in DOC  
85 provides a unique perspective on mechanisms underlying human consciousness. We first  
86 hypothesized that the aperiodic EEG component would have diagnostic value for individuals in  
87 DOC above and beyond the traditional analysis of EEG oscillatory power. We further hypothesized  
88 that the pharmacologically induced change in the aperiodic component would vary with individuals'  
89 level of, and capacity for, consciousness, and that this change would be accompanied by the brain's  
90 loss of network criticality.

## 91 **Results**

92 This study combined two existing datasets of DOC participants (n= 43), a subset of whom (n= 16)  
93 were exposed to a targeted infusion of propofol anesthesia (see Methods). To characterize the  
94 aperiodic EEG component associated with level of consciousness, we first analyzed an existing  
95 dataset of 128-channel EEG recorded from 43 individuals in DOC at resting state. As a surrogate  
96 for consciousness, the level of responsiveness of each participant was assessed by a trained  
97 experimenter using the Coma Recovery Scale-Revised (CRS-R) (24). For participants in an acute  
98 DOC (n = 18), recovery of consciousness was assessed three months post-EEG. At this time, six

99 participants had recovered full consciousness (i.e., were able to respond verbally and consistently  
100 follow commands) (see Methods). The PSD was calculated using the Multitaper method. The  
101 aperiodic component of the EEG was defined by the offset and slope of the PSD (i.e., a steeper  
102 slope indicating faster decay of power over frequencies). Both parameters of the aperiodic  
103 component were estimated from 1-45 Hz using the 'Fitting oscillations and one over f' (FOOOF)  
104 algorithm (16) (see Methods). Oscillatory power in the delta (1-4 Hz), theta (4-8 Hz), alpha (8-13  
105 Hz), beta (13-30 Hz) and gamma (30-45 Hz) bandwidth was calculated before and after the removal  
106 of the aperiodic component. The detection of oscillatory peak frequency was performed using the  
107 FOOOF algorithm.

### 108 ***Aperiodic EEG component contains more diagnostic value than oscillatory power for*** 109 ***individuals in a DOC***

110 Splitting the PSD into aperiodic and oscillatory components (see Fig. 1A) revealed a positive  
111 correlation between the slope of the aperiodic component and participants' CRS-R score ( $r = 0.38$ ,  
112  $p = 0.01$ , 95% CI [0.14, 0.57]), with flatter slope indicating higher levels of responsiveness (see Fig.  
113 1D). In contrast to previous research (25, 26), we did not find a significant correlation between  
114 spectral power in any frequency band and participants' CRS-R score (see Fig.1B, Fig.S1 for all  
115 frequency bands). The oscillatory-only component (i.e., after removal of the aperiodic component)  
116 was also not significantly correlated to CRS-R score (see Fig. 1C, Fig. S1 for all frequency bands).

117 We conducted a multiple regression analysis to investigate the diagnostic information of the  
118 aperiodic component over and above the traditional power analysis. Combining oscillatory power  
119 over five canonical frequency bands (i.e., delta, theta, alpha, beta, gamma without removing the  
120 aperiodic component) and aperiodic features (i.e., spectral slope and offset) in one model (see Fig.  
121 1E), the spectral slope ( $\beta = 1.56$ ,  $p = 0.002$ ) was the only significant predictor of participants' CRS-  
122 R score (see Table 1). A forward feature selection revealed that the spectral slope alone explained  
123 12.9% of the variance ( $R^2 = 0.129$ ,  $F(1,40) = 6.78$ ,  $p = 0.013$ ).

124 An oscillatory peak could be identified in only 12 out of 43 individuals in DOC (see Fig. S2). Peaks  
125 were predominantly identified in the theta to lower-alpha frequency range ( $5.1 \text{ Hz} \pm 3.01$ ). Neither  
126 the peak frequency, nor the power of the identified peak oscillation (for  $n = 12$ ) correlated with  
127 individuals' CRS-R score (see Fig. S2, see Discussion). Most importantly, no oscillatory peak was  
128 detected in the remaining 31 participants, leaving solely the aperiodic EEG component for analysis.

129 To control for known changes of the aperiodic component over lifespan (27), all models were  
130 controlled for participants' age, which correlated positively with participants CRS-R score ( $R^2 = 0.11$ ,  
131  $F(1,41) = 5.10$ ,  $p = 0.03$ ) (see Table 1). There was no significant correlation between the offset of the  
132 aperiodic component and participants' CRS-R score. The spectral slope was significantly steeper  
133 in acute DOC, compared to individuals with chronic DOC ( $t(41) = 2.63$ ,  $p = 0.01$ ) (see Fig. S1). There  
134 was no significant difference in the spectral slope or the identified peak between participants who  
135 did or did not recover consciousness. In this analysis, the aperiodic component was estimated  
136 using the 'knee mode' of the FOOOF algorithm ( $\text{min\_peak\_height} = 0.1$ ,  $\text{max\_n\_peaks} = 10$ ) (16); all  
137 results were replicated using the 'fixed mode' (see Fig. S1).

### 138 ***Participants with higher levels of consciousness exhibit larger changes of the aperiodic*** 139 ***EEG component in response to anesthesia***

140 Measuring the brain's reaction to perturbations has shown strong potential for the assessment of  
141 individuals in altered states of consciousness (21, 28) (see Discussion). General anesthesia is  
142 known to globally perturb brain networks, resulting in loss of consciousness *and* responsiveness.  
143 We investigated how the global perturbation of the brain network using propofol anesthesia alters  
144 the spectral slope in individuals in DOC and whether this response contains information about an  
145 individual's pre-anesthetic level of consciousness. Given that the spectral slope in healthy adult

146 EEG steepens in response to propofol anesthesia (10, 11), we hypothesized that larger steepening  
147 of the spectral slope in response to anesthesia would be associated with higher levels of  
148 consciousness.

149 We analyzed an existing dataset of 16 individuals in DOC undergoing a protocol of propofol  
150 anesthesia (see Methods). We compared 5 minutes of 128-channel EEG recorded prior to the  
151 anesthetic protocol (i.e., Baseline state) and during propofol anesthesia (i.e., Anesthesia state). For  
152 individuals in an acute DOC ( $n = 11$ ), recovery of consciousness was assessed three months post-  
153 EEG. At this time, five participants had recovered full consciousness (i.e., were able to respond  
154 verbally and consistently follow commands), four participants did not recover consciousness and  
155 two participants had life-sustaining treatment withdrawn (see Methods). The aperiodic component  
156 of the EEG was defined by the offset and slope of the PSD and estimated using the FOOOF  
157 algorithm (see Methods). The propofol-induced change of the aperiodic component  $\Delta$ slope and  
158  $\Delta$ offset was defined by the difference between the value in the Baseline and Anesthesia conditions  
159 (Baseline – Anesthesia). In order to capture the aperiodic component of the traditionally assessed  
160 bandwidths, we focused on the spectral slope in the 1-45 Hz. Due to prior evidence that the spectral  
161 slope in higher frequencies ( $> 30$  Hz) is specifically sensitive on the effect of anesthesia (10, 11),  
162 we also assessed the spectral slope in the 30-45 Hz range.

163 Anesthesia significantly steepened the spectral slope in the 30-45 Hz range ( $t(15) = 4.554$ ,  $p <$   
164  $0.001$ ) and the 1-45 Hz range ( $t(15) = 2.542$ ,  $p < 0.05$ ) (see Fig. 2A, 2B). Anesthesia had a  
165 significant effect on the spectral offset in the 30-45 Hz ( $t(15) = -3.685$ ,  $p < 0.01$ ), but not in the 1-45  
166 Hz range (see Fig. S3). Most interestingly, the anesthetic-induced change of both aperiodic  
167 parameters  $\Delta$ slope ( $R^2=0.23$ ,  $F(1,13)=6.33$ ,  $p<0.05$ ) and  $\Delta$ offset ( $R^2=0.22$ ,  $F(1,13)=5.85$ ,  $p<0.05$ )  
168 in the 30-45 Hz range correlated positively with participant's CRS-R score (see Fig. S3).  
169 Participants with a higher CRS-R score exhibited a larger steepening of the slope in response to  
170 propofol anesthesia. The  $\Delta$ slope in both frequency ranges were dependent on the spectral slope  
171 at Baseline ( $r = 0.53$ ,  $p<0.05$ ), with a flatter spectral slope indicating a stronger change in response  
172 to propofol (see Fig. S3).

173 Contradicting previous research in healthy adults (10, 11), some participants exhibited a flattening  
174 of the spectral slope in response to exposure to anesthesia (see Fig. 2B, see Discussion). The  
175 absolute value of  $\Delta$ slope strengthened the correlation to participants CRS-R score ( $R^2=0.30$ ,  
176  $F(1,13)=9.62$ ,  $p<0.01$ ), with a higher CRS-R score indicating a stronger change of the aperiodic  
177 component in response to propofol (see Fig. 2D). This effect could not be replicated in the 1-45 Hz  
178 range. While the  $\Delta$ slope in the 30-45 Hz range was homogenously distributed, the slope in the 1-  
179 45 Hz range differed between central-parietal and lateral regions (see Fig. 2C). Participants'  $\Delta$ slope  
180 did not differ between chronic and acute states (see Fig. S3).

### 181 ***The aperiodic EEG component during exposure to anesthesia contains prognostic*** 182 ***information for individuals in a DOC***

183 During the anesthetized state, the 1-45 Hz aperiodic EEG component distinguished participants  
184 who recovered consciousness from those who did not recover consciousness (see Fig. 2E).  
185 Participants who recovered consciousness exhibited a significantly steeper spectral slope ( $t(7) = -$   
186  $3.57$ ,  $p < 0.01$ ) and higher offset ( $t(7) = 2.50$ ,  $p < 0.05$ ), compared to participants who did not recover  
187 consciousness. There was no prognostic value in the spectral slope at Baseline, nor in the propofol-  
188 induced change of the aperiodic component. The effect was not replicated in the 30-45 Hz range.

### 189 ***Propofol-induced loss of criticality is accompanied by change in the EEG spectral slope***

190 During conscious wakefulness, the brain is considered to be tuned to a critical state, which  
191 maximizes the network's information-richness, computational efficiency and sensitivity to  
192 perturbations (1, 2). The brain's reaction to general anesthesia is characterized by a divergence

193 from this critical state (4, see 5 as a review, 8, 9, 29), resulting in a loss of network integration (30–  
194 32), signal complexity and sensitivity to perturbations (33, 34). The aperiodic component of the  
195 EEG is strongly linked to these measures and has been correlated with signal complexity (20, 35),  
196 the perturbation complexity index (10) and the brain's balance between excitation and inhibition  
197 (20). Further, Toker et al. (4) demonstrated that the propofol-induced steepening of the spectral  
198 slope accompanies the brain's distancing from criticality. To further investigate the mechanism  
199 underlying the change in the aperiodic component, we investigated how the propofol-induced  
200 change of the spectral slope was related to alterations in network criticality and complexity. We  
201 hypothesized that there would be a strong alignment between the propofol-induced change in the  
202 EEG aperiodic component and changes in network complexity and criticality.

203  
204 Signal complexity was estimated using the Lempel-Ziv complexity (LZC) (36) on the median-  
205 binarized time series (see Methods). The network criticality was estimated using the pair correlation  
206 function (PCF), which has previously been linked to the information integration of the underlying  
207 brain network (29). Both measures were estimated in the 1-45 Hz range (see Methods, see  
208 Discussion). The propofol-induced change of the signal complexity and network criticality was  
209 defined by the difference between the values in the Baseline and Anesthesia condition (Baseline –  
210 Anesthesia).

211  
212 We first assessed how the magnitude of change of the spectral slope depended on the brain's  
213 signal complexity and criticality at the Baseline state. In the 1-45 Hz range, the absolute change of  
214 the spectral slope correlated with the Baseline signal complexity ( $R^2=0.57$ ,  $F(1,14)=18.25$ ,  $p<0.001$ )  
215 and criticality ( $R^2=0.25$ ,  $F(1,14)=4.72$ ,  $p<0.05$ ) (see Fig. 3A). Participants with higher complexity  
216 and criticality exhibited a stronger steepening of the spectral slope following exposure to propofol  
217 anesthesia. In the 30-45 Hz range, the change of slope was strongly related to the baseline network  
218 criticality ( $R^2=0.44$ ,  $F(1,14)=11.13$ ,  $p<0.01$ ), but did not depend on signal complexity.

219  
220 Additionally, we demonstrated how the change of spectral slope not only depended on the  
221 properties of the brain at Baseline, but also reflected the brain's anesthetic-induced loss of  
222 criticality. The propofol-induced change in network criticality positively correlated with the change  
223 of the spectral slope in the 1-45 Hz ( $R^2=0.44$ ,  $F(1,14)=11.09$ ,  $p<0.01$ ), and 30-45 Hz range  
224 ( $R^2=0.36$ ,  $F(1,14)=7.93$ ,  $p<0.05$ ) (see Fig. 3B). Similarly, the change in network complexity was  
225 positively correlated to the change of the spectral slope in the 1-45 ( $R^2=0.80$ ,  $F(1,14)=55.63$ ,  
226  $p<0.001$ ), and 30-45 Hz range ( $R^2=0.32$ ,  $F(1,14)=6.50$ ,  $p<0.05$ ). Most interestingly, participants  
227 who showed a propofol-induced flattening of the spectral slope (see Fig. 2B, 3B) also exhibited an  
228 increased signal complexity and network criticality in the anesthetized state (see Discussion).

229  
230 Cumulatively, the magnitude of propofol-induced change of the spectral slope was highly  
231 dependent on the brain's signal complexity and criticality at Baseline, with a more complex and  
232 critical brain indicating stronger alteration of the spectral slope in response to propofol anesthesia.  
233 Additionally, the change of the spectral slope accompanied the propofol-induced loss of network  
234 complexity and criticality. In line with previous research (20, 35), the spectral slope ( $R^2=0.55$ ,  
235  $F(1,41)=50.43$ ,  $p<0.001$ ) and offset ( $R^2=0.51$ ,  $F(1,41)=43.51$ ,  $p<0.001$ ) at baseline in the 1-45 Hz,  
but not the 30-45 Hz range significantly correlated with signal complexity (see Fig. S4).

## 236 Discussion

237 This is the first study to investigate the aperiodic component of EEG and its response to propofol  
238 for the assessment of level of and capacity for consciousness in individuals in a DOC. We showed  
239 that the aperiodic component in the baseline EEG of individuals in a DOC contains diagnostic  
240 information above and beyond traditional analysis of periodic EEG components. The significance  
241 of this finding is underscored by the fact that although 75% of the DOC participants included in this  
242 study did not have an EEG oscillatory peak, analysis of EEG oscillatory power remains by far the  
243 most prevalent method for investigating the brain activity in this population. Building upon previous  
244 work from our group showing that global brain network perturbation using anesthesia has

245 prognostic value (28), we also investigated the prognostic value of the aperiodic EEG component  
246 change upon exposure to propofol. We showed that the propofol-induced change of the EEG  
247 aperiodic component accompanied loss of network criticality and was correlated with the  
248 individuals' level of consciousness. Cumulatively, our results highlight the urgent need to reconsider  
249 analysis of DOC brain activity in light of the diagnostic and prognostic information contained in the  
250 traditionally discarded aperiodic EEG component. Our results further support the proposition that  
251 the brain of individuals in DOC operates far from a critical point (4), resulting in weaker network  
252 susceptibility to global perturbations, such as propofol anesthesia.

253 It has been widely proposed that the diagnostic and prognostic power of the EEG aperiodic  
254 component should be investigated in brain-injured, unresponsive patients (10, 11). The strong  
255 evidence that the aperiodic EEG component distinguishes states of wakefulness from sleep (11)  
256 and general anesthesia (10, 11) motivated investigations of diagnostic value of this signal for  
257 unresponsive patients. In a clinical population, Lanzzone et al. (37) proposed the aperiodic slope as  
258 an index for longitudinal recovery from stroke. To date, only a single study by Alnes et al. (35)  
259 assessed the spectral properties of pathologically unresponsive individuals and showed that the  
260 aperiodic component of the EEG is altered in patients in a coma, compared to healthy adults.  
261 However, EEG in this study was recorded when participants were under varying levels of sedation:  
262 this critically affects interpretation of the results, as the non-oscillatory characteristics of DOC are  
263 overshadowed by the known effect of anesthesia on the spectral slope. Our study compares the  
264 aperiodic EEG component for DOC participants before and during exposure to anesthesia, not only  
265 dissociating these two potentially confounding factors, but also illustrating the diagnostic potential  
266 of the within-subject changes in spectral slope in this population.

267 Traditionally, DOC has been described through alterations in the power of canonical EEG  
268 frequency bands (see 38 as a review). Recent best practice in EEG analysis recommends removing  
269 the aperiodic component from the signal prior to power analysis (17). However, the EEG of  
270 individuals in DOC is most commonly characterized by a total absence of oscillatory peaks. While  
271 this prevents any meaningful oscillation-based analysis, our study demonstrated that the aperiodic  
272 component of EEG still contains important information about the individual's level and capacity for  
273 consciousness. However, the results of our study do not support neglecting oscillatory power per  
274 se; rather, they highlight the value of the aperiodic component in populations where oscillatory  
275 peaks are not systematically present.

276 Although previous research found significant correlations between participant's CRS-R score and  
277 power in alpha (25) and delta bandwidth (26), we did not reproduce these results in the current  
278 study. We consider two possible explanations for this discrepancy: first, whereas Chennu et al. (25)  
279 included individuals with CRS-R score above 7, only 24% of the participants in this study met this  
280 criterion. This suggests that EEG oscillations may increase nonlinearly with an individuals' level of  
281 consciousness, which should be explored in future research. Second, when analyzing power in  
282 narrow frequency bands, changes in the power spectrum driven solely by the slope of the aperiodic  
283 component can be misinterpreted as a decrease in low frequencies and increase in high  
284 frequencies (17). Thus, the previously shown increased delta power in individuals with lower levels  
285 of consciousness (25, 26) might in fact be epiphenomenal to a steepening of the steeper spectral  
286 slope, instead of oscillatory power.

287 Other studies have also presented evidence for the role of EEG oscillatory power in the assessment  
288 of DOC. Lechinger et al (26) demonstrated a correlation between the occipital peak frequency and  
289 individuals' level of consciousness. However, participants who did not exhibit an oscillatory peak  
290 were excluded from the analysis (26). We hypothesize that oscillatory power and peak frequency,  
291 if present, can play a complementary role to the aperiodic component for the diagnosis of levels of  
292 consciousness. Although we cannot test this hypothesis directly in this study, as only 6 out of 43  
293 participants exhibited an oscillatory peak in the 4-13 Hz range, this remains a fruitful area for further  
294 research. In the case that no oscillatory peak is present, our results demonstrate that diagnostic  
295 value for individuals in DOC might be fully attributable to the aperiodic component.

296 Despite strong evidence that the spectral slope is related to consciousness (10, 11), there is  
297 disagreement about whether it is a measure of arousal (i.e. vigilance) (11) or the level of  
298 consciousness (i.e. awareness) (10). Rather than framing our results within these dimensions –  
299 which have been criticized as failing to represent the multifaceted nature of consciousness and its  
300 disorders (39) -- we focus on a mechanistic interpretation of the aperiodic component and its link  
301 to consciousness. Using in-silico modeling, the slope of the aperiodic component has been  
302 suggested to be a marker of the network's E/I balance (19, 20). Consciousness has been proposed  
303 to be underpinned by an optimal E/I balance (4), which tunes the brain towards a state of criticality  
304 and information-richness (7). When this balance is disrupted (i.e. more inhibition than excitation)  
305 the network diverges from criticality, exhibits a steeper spectral slope (see 5 as a review, 19, 20)  
306 and reduced signal complexity (20).

307 Exposure to the inhibitory drug propofol causes steepening of the spectral slope (10, 11), reflecting  
308 the brain's shift towards inhibition. In this study, the anesthetic-induced change of the spectral slope  
309 correlated with participants' CRS-R score and thus, depended on their baseline level of  
310 consciousness. One potential explanation for this phenomenon is that the effect of propofol  
311 depends on the pre-anesthetic E/I balance. While exposure to propofol has a large effect on a well-  
312 balanced brain, an imbalanced brain might have less capacity to shift, as it is closer to maximum  
313 imbalance. In other words, the already-steepened spectral slope in comatose patients could reflect  
314 the brain's high imbalance and distance to criticality, resulting in a reduced response to propofol  
315 anesthesia. Comparably, stronger brain network reconfiguration in the alpha bandwidth following  
316 exposure to propofol has been linked to higher potential for recovery of consciousness (28). Thus,  
317 one potential interpretation of our results is that individuals in DOC are characterized by an E/I  
318 imbalance, with higher imbalance resulting in a reduced reaction of the aperiodic component to  
319 general anesthesia and lower levels of consciousness.

320 Despite the group-level steepening of the spectral slope during exposure to anesthesia, some  
321 individuals in DOC exhibited an alternative pattern: a flatter spectral slope in the anesthesia state,  
322 accompanied by a more complex signal and increased criticality. Toker et al. (4) observed a similar  
323 inconsistency, with one individual in DOC exhibiting a reduction in chaoticity after regaining  
324 consciousness. Although an increase of complexity and flattening of the spectral slope following  
325 exposure to anesthesia is counterintuitive for healthy individuals, DOC is a heterogenous set of  
326 conditions. The spectral slope in the 1-45 Hz range at baseline clearly separated individuals with  
327 DOC into two groups: individuals with flatter slopes exhibited a propofol-induced steepening of the  
328 slope, while individuals with slopes steeper than 2.6 showed a countertrend flattening of the  
329 spectral slope (see Fig. 2B). Further characterization of the clinical differences between these  
330 groups is warranted in future research.

331 The results of this study should be interpreted in light of several limitations. First, participants were  
332 assessed using the JFK Coma Recovery Scale-Revised (CRS-R) (24), which is a behavioral scale  
333 for the assessment of responsiveness. The resulting score is widely used as a surrogate measure  
334 of consciousness. However in DOC, consciousness can be fully dissociated from behavior (12–  
335 14). Thus, it is possible that the true level of consciousness in study participants was not accurately  
336 captured by this metric and that true levels of consciousness were underestimated by the  
337 behavioral score of responsiveness. Whereas the first part of this study (Baseline recording) cannot  
338 differentiate whether the aperiodic component captures levels of consciousness or responsiveness,  
339 the value of the aperiodic component for detecting covert consciousness in unresponsive  
340 individuals could be explored in future research. In the second part of this study, DOC participants  
341 underwent a protocol of propofol anesthesia. Independent of the pre-anesthetic level of  
342 responsiveness, the individual's anesthetic-induced brain reaction and changes in the spectral  
343 slope are attributable to loss of consciousness, which might diverge from the degree of anesthetic-  
344 induced loss of responsiveness. Thus, a strong brain reaction to anesthetics despite low to no  
345 behavioral changes, might be an indicator for higher pre-anesthetic levels of consciousness  
346 reaching beyond the estimated level of responsiveness. This possibility should be more closely  
347 investigated in future research.



348 Second, participants in this study were recruited after a variety of brain injuries, including stroke,  
349 traumatic and anoxic brain injury. Although the spectral slope is more negative in the hemisphere  
350 most affected by a stroke, (37), this study did not account for the location of the brain injury.  
351 Additionally, the trend towards low CRS-R score within this study's participants led to high  
352 imbalance between the classical diagnostic groups (i.e., coma, unresponsive wakefulness  
353 syndrome, minimally conscious state, emergence). We therefore did not perform a group-  
354 comparative statistical analysis to distinguish the classical diagnostic categories. Third, this study  
355 explored the link between the aperiodic component and criticality, measured by the PCF (29).  
356 Whereas this measure of criticality is commonly estimated on oscillation in the alpha frequency  
357 band (29, 40), the lack of oscillatory patterns in this studies population did not justify the use of a  
358 narrow frequency band. The PCF is only one measure within a large methodological framework of  
359 network criticality (see 5 as a review); the broader exploration of the aperiodic component and its  
360 relation to measures of criticality, which do not rely on oscillation, is strongly recommended for  
361 future research. Fourth, the detection of oscillatory peaks in the first part of the analysis was  
362 performed on the electrode-averaged spectrum. Whereas most individual's electrode-averaged  
363 PSD did not exhibit oscillatory peaks, we cannot exclude the possibility of small oscillatory peaks  
364 on the level of single electrodes.

365 In conclusion, we have demonstrated the value of the aperiodic EEG component for the  
366 assessment of individuals in a DOC following brain injury. At baseline, individuals with a lower level  
367 of consciousness exhibit a steeper spectral slope (i.e., faster decay of power over frequency). The  
368 anesthetic-induced change in the aperiodic component accompanies the brain's loss of criticality  
369 and complexity and is informative about an individual's baseline level of consciousness and their  
370 potential to recover consciousness. The aperiodic EEG component has been historically discarded;  
371 this research highlights a critical need to reconsider the traditional treatment of this component of  
372 the EEG in research with individuals in DOC.

## 373 **Materials and Methods**

### 374 ***Participants and anesthetic protocol***

375 This study combined two existing datasets of DOC participants (i.e., one dataset of Baseline EEG  
376 recordings and one dataset of individuals in DOC, undergoing an anesthetic protocol). In total, 43  
377 individuals in a DOC (22 male,  $42 \pm 15.13$  years old) were included in this study. Individuals in a  
378 DOC were included following acquired brain injury (anoxic, traumatic, hypoxic brain injury, stroke)  
379 and assessed by a trained experimenter using the Coma Recovery Scale-Revised (CRS-R) (24).  
380 Participants were excluded if they were receiving sedation at the time of the study. For all  
381 participants, written informed consent was provided by their legal representative in accordance with  
382 the Declaration of Helsinki. The study was approved by the McGill University Health Center  
383 Research Ethics Board (15-996-MP-CUSM) and the Western University Health Science Research  
384 Ethics Board (Project ID 100628). Among the DOC participants, 14 were in MCS, 25 in UWS and  
385 four in a coma (CRS-R =  $5.88 \pm 4.02$ ). For participants in an acute DOC ( $n = 18$ ), clinical outcomes  
386 were assessed three months post recording. At this time, six participants had recovered full  
387 consciousness (i.e., were able to respond verbally and consistently follow commands). Nine  
388 participants did not recover consciousness remained in a DOC. Three participants had life-  
389 sustaining treatment withdrawn and were not excluded from the analysis of prognostic value.

390 Sixteen ( $n=16$ ) of the above described individuals in a DOC (5 male,  $44 \pm 18.24$  years old)  
391 underwent an anesthetic protocol, explained in (41). Briefly, participants were anesthetised with  
392 propofol at a target effect site concentration of  $2.0 \mu\text{g/ml}$ . In this study, we include a period of 5  
393 minutes resting state prior to the start of the anesthetic protocol (referred to as: Baseline state) as  
394 well as the period of 5 minutes during the infusion of propofol, after the effect site concentration of  
395  $2.0 \mu\text{g/ml}$  has been reached (referred to as: Anesthetized state). Within this subset 11 individuals  
396 were in an acute state. Within three months post recording, five participants had recovered full

397 consciousness (i.e., were able to respond verbally and consistently follow commands), four  
398 participants did not recover consciousness and two participants had life-sustaining treatment  
399 withdrawn.

#### 400 ***Electroencephalography data***

401 Data in both datasets were recorded from a 128-channel EGI Sensor Net using an Amps 400  
402 amplifier (Electrical Geodesic, Inc., USA), a sampling rate of 1 kHz and vertex reference. Electrode  
403 impedance was reduced to below 5K $\Omega$  prior to data collection. Two participants were recorded  
404 using a 64-channel EEG system. Prior to analysis, the raw signal was filtered between 0.5 to 55  
405 Hz, average referenced and resampled to 250 Hz. A notch filter was applied at 60 Hz. Channels  
406 with an excessive level of noise were removed prior to average referencing. Non-brain channels  
407 were removed from the subsequent analysis. The signal was then epoched in non-overlapping  
408 segments of 10 seconds. The signal was visually inspected by a trained investigator to manually  
409 reject epochs containing nonphysiologically artifacts. All preprocessing steps were performed using  
410 the MNE python toolbox (42).

#### 411 ***Spectral slope and power analysis***

412 The power spectra were calculated for every electrode and epoch, using the Multitaper approach  
413 (43). All spectral estimates were performed using a frequency range from 0.5 to 50 Hz and a  
414 frequency smoothing of  $\pm 0.5$  Hz, resulting in the use of 9 discrete prolate slespian sequences (dpss)  
415 tapers (43). The aperiodic component was defined by the EEG spectral slope and offset which were  
416 calculated using the FOOOF package (16). This algorithm parametrizes the EEG into an aperiodic  
417 and oscillatory component. The aperiodic component of the PSD over frequencies  $F$  is defined by:

$$418 \quad \text{Aperiodic component} = b - \log(k + F^\chi),$$

419 where  $b$  is the spectral offset,  $k$  is the knee parameter and  $\chi$  is the spectral slope. To be coherent  
420 with previous research (10, 11), the spectral slope was herein defined by  $-\chi$ . In the 1-45 Hz range,  
421 the algorithm was fit using the fixed and knee aperiodic mode (min\_peak\_height=0.1,  
422 max\_n\_peaks=10). Whereas the knee mode fits an additional parameter  $k$  to the data, this  
423 parameter is set to 0 in the fixed mode. In the 30-45 Hz range we exclusively used the fixed mode  
424 to fit the data. This can be justified by the narrower frequency band which does not require a knee  
425 fit. The results from the model using the knee mode yield an overall better model fit (see Fig. S1)  
426 and was presented in this paper. The model error and analysis using the knee mode is provided in  
427 the supplementary material (see Fig. S1). The power spectra, as well as the spectral slope were  
428 calculated for every participant, epoch, and electrode independently and averaged subsequently.  
429 Is it to note that estimating the aperiodic component on the time-averaged PSD did not affect any  
430 of the results.

431 Power analysis in the delta (1-4 Hz), theta (4-8 Hz), alpha (8-13 Hz), beta (13-30 Hz) and gamma  
432 (30-45 Hz) bands was performed before and after the removal of the broadband aperiodic  
433 component from the PSD. In the first part, oscillatory power was calculated using the relative  
434 contribution of one frequency band to the overall PSD. In the second step, the PSD was flattened  
435 (i.e. removal of the aperiodic component) using the FOOOF package (16). The resulting oscillatory  
436 power was averaged within each frequency band. To identify whether the PSD of a signal  
437 participant exhibits a peak frequency, a separate model was fit on the electrode-averaged PSD.  
438 The propofol-induced change of the spectral slope was defined as the distance between the  
439 baseline value and the value in the anesthetized state (i.e. Baseline – Anesthesia).

440

#### 441 **Complexity and Criticality**

442 After binarizing every channel using their individual medians, complexity was calculated using the  
443 Lempel-Ziv Complexity (36) implementation of the Antropy toolbox (44). Complexity was calculated  
444 for every channel and epoch individually and averaged subsequently. Criticality of the brain network  
445 was defined using the pair correlation function, which is an estimate of global phase synchronization  
446 or network susceptibility (29, 40). Both values were estimated on the full frequency range (1-45Hz).  
447 The PCF was defined as the average PCF per channel. The propofol-induced change in both  
448 measures was defined as the distance between the baseline value to the value in the anesthetized  
449 state.

#### 450 **Statistical analysis**

451 Statistical analysis was performed using JASP (45). The link between the oscillatory and aperiodic  
452 component with participants' CRS-R score was assessed using Pearson correlation and  
453 multivariate linear regression, preconditioned on participants age. Confidence intervals were  
454 estimated using bootstrapping (1000 iterations). The change of the spectral slope in response to  
455 propofol anesthesia was assessed using repeated measures t-test. Group differences between  
456 recovered and non-recovered participants were assessed using independent t-test.

#### 457 **Acknowledgments**

458 The authors thank all participants for their involvement in the study. They also wish to thank  
459 Uncheol Lee for providing code for the criticality analysis, Caroline Arbour for her assessments and  
460 training on the CRS-R, as well as Yacine Mahdid, Danielle Nadin, Alexander Rokos, Jason da Silva  
461 Castanheira, Laura Gonzalez-Lara and Miriam Han for their involvement in participant recruitment  
462 and data acquisition. AMO is a CIFAR Fellow. SBM is supported by the Canada Research Chairs  
463 Program (Tier II). This research is supported in part by the FRQNT Strategic Clusters Program  
464 (2020-RS4-265502 - Centre UNIQUE - Union Neurosciences & Artificial Intelligence – Quebec.  
465 This study was funded through an NSERC Discovery Grant (RGPIN-201603817), the Canada  
466 Excellence Research Chairs Program (#215063) and the Canadian Institutes of Health Research  
467 (#408004). This research was undertaken thanks in part to funding from the Canada First Research  
468 Excellence Fund and Fonds de recherche du Québec, awarded to the Healthy Brains, Healthy  
469 Lives initiative at McGill University.

#### **References**

1. R. L. Carhart-Harris, The entropic brain - revisited. *Neuropharmacology* **142**, 167–178 (2018).
2. R. L. Carhart-Harris, *et al.*, The entropic brain: a theory of conscious states informed by neuroimaging research with psychedelic drugs. *Front. Hum. Neurosci.* **8** (2014).
3. J. M. Beggs, D. Plenz, Neuronal Avalanches in Neocortical Circuits. *J. Neurosci.* **23**, 11167–11177 (2003).
4. D. Toker, *et al.*, Consciousness is supported by near-critical slow cortical electrodynamics. *PNAS* **119** (2022).
5. V. Zimmern, Why Brain Criticality Is Clinically Relevant: A Scoping Review. *Frontiers in Neural Circuits* **14** (2020).

6. S. Zhou, Y. Yu, Synaptic E-I Balance Underlies Efficient Neural Coding. *Frontiers in Neuroscience* **12** (2018).
7. W. L. Shew, H. Yang, S. Yu, R. Roy, D. Plenz, Information Capacity and Transmission Are Maximized in Balanced Cortical Networks with Neuronal Avalanches. *J. Neurosci.* **31**, 55–63 (2011).
8. G. Solovey, *et al.*, Loss of Consciousness Is Associated with Stabilization of Cortical Activity. *J. Neurosci.* **35**, 10866–10877 (2015).
9. E. Tagliazucchi, *et al.*, Large-scale signatures of unconsciousness are consistent with a departure from critical dynamics. *J R Soc Interface* **13**, 20151027 (2016).
10. M. A. Colombo, *et al.*, The spectral exponent of the resting EEG indexes the presence of consciousness during unresponsiveness induced by propofol, xenon, and ketamine. *NeuroImage* **189**, 631–644 (2019).
11. J. D. Lendner, *et al.*, An electrophysiological marker of arousal level in humans. *Elife* **9**, e55092 (2020).
12. R. D. Sanders, G. Tononi, S. Laureys, J. W. Sleigh, D. S. Warner, Unresponsiveness  $\neq$  Unconsciousness. *Anesthesiology* **116**, 946–959 (2012).
13. G. A. Mashour, M. S. Avidan, Capturing covert consciousness. *The Lancet* **381**, 271–272 (2013).
14. A. M. Owen, *et al.*, Detecting Awareness in the Vegetative State. *Science* **313**, 1402–1402 (2006).
15. C. B. Swisher, S. R. Sinha, Utilization of Quantitative EEG Trends for Critical Care Continuous EEG Monitoring: A Survey of Neurophysiologists. *Journal of Clinical Neurophysiology* **33**, 538–544 (2016).
16. T. Donoghue, *et al.*, Parameterizing neural power spectra into periodic and aperiodic components. *Nat Neurosci* **23**, 1655–1665 (2020).
17. T. Donoghue, N. Schaworonkow, B. Voytek, Methodological considerations for studying neural oscillations. *European Journal of Neuroscience*, 1–26 (2021).
18. S. D. Muthukumaraswamy, D. T. J. Liley, 1/f electrophysiological spectra in resting and drug-induced states can be explained by the dynamics of multiple oscillatory relaxation processes. *NeuroImage* **179**, 582–595 (2018).
19. R. Gao, E. J. Peterson, B. Voytek, Inferring synaptic excitation/inhibition balance from field potentials. *NeuroImage* **158**, 70–78 (2017).
20. V. Medel, M. Irani, T. Ossandón, G. Boncompte, “Complexity and 1/f slope jointly reflect cortical states across different E/I balances” (2020).

21. A. G. Casali, *et al.*, A Theoretically Based Index of Consciousness Independent of Sensory Processing and Behavior. *Science Translational Medicine* **5**, 198ra105-198ra105 (2013).
22. C. Timmermann, *et al.*, Neural correlates of the DMT experience assessed with multivariate EEG. *Sci Rep* **9**, 16324 (2019).
23. P. L. Purdon, *et al.*, Electroencephalogram signatures of loss and recovery of consciousness from propofol. *PNAS* **110**, E1142–E1151 (2013).
24. K. Kalmar, J. T. Giacino, The JFK coma recovery scale—revised. *Neuropsychological Rehabilitation* **15**, 454–460 (2005).
25. S. Chennu, *et al.*, Spectral Signatures of Reorganised Brain Networks in Disorders of Consciousness. *PLOS Computational Biology* **10**, e1003887 (2014).
26. J. Lechinger, *et al.*, CRS-R score in disorders of consciousness is strongly related to spectral EEG at rest. *J Neurol* **260**, 2348–2356 (2013).
27. B. Voytek, *et al.*, Age-Related Changes in 1/f Neural Electrophysiological Noise. *J. Neurosci.* **35**, 13257–13265 (2015).
28. C. Duclos, *et al.*, Brain Responses to Propofol in Advance of Recovery From Coma and Disorders of Consciousness: A Preliminary Study. *Am J Respir Crit Care Med* (2021) <https://doi.org/10.1164/rccm.202105-1223OC>.
29. H. Kim, U. Lee, Criticality as a Determinant of Integrated Information  $\Phi$  in Human Brain Networks. *Entropy* **21**, 981 (2019).
30. M. T. Alkire, A. G. Hudetz, G. Tononi, Consciousness and Anesthesia. *Science* **322**, 876–880 (2008).
31. U. Lee, G. A. Mashour, S. Kim, G.-J. Noh, B.-M. Choi, Propofol induction reduces the capacity for neural information integration: Implications for the mechanism of consciousness and general anesthesia. *Consciousness and Cognition* **18**, 56–64 (2009).
32. J. Schrouff, *et al.*, Brain functional integration decreases during propofol-induced loss of consciousness. *NeuroImage* **57**, 198–205 (2011).
33. S. Sarasso, *et al.*, Consciousness and Complexity during Unresponsiveness Induced by Propofol, Xenon, and Ketamine. *Current Biology* **25**, 3099–3105 (2015).
34. M. Schartner, *et al.*, Complexity of Multi-Dimensional Spontaneous EEG Decreases during Propofol Induced General Anaesthesia. *PLOS ONE* **10**, e0133532 (2015).
35. S. L. Alnes, M. D. Lucia, A. O. Rossetti, A. Tzovara, Complementary roles of neural synchrony and complexity for indexing consciousness and chances of surviving in acute coma. *NeuroImage* **245**, 118638 (2021).
36. A. Lempel, J. Ziv, On the Complexity of Finite Sequences. *IEEE Transactions on Information Theory* **22**, 75–81 (1976).

37. J. Lanzone, *et al.*, EEG spectral exponent as a synthetic index for the longitudinal assessment of stroke recovery. *Clinical Neurophysiology* (2022) <https://doi.org/10.1016/j.clinph.2022.02.022>.
38. Y. Bai, X. Xia, X. Li, A Review of Resting-State Electroencephalography Analysis in Disorders of Consciousness. *Front. Neurol.* **8** (2017).
39. T. Bayne, J. Hohwy, A. M. Owen, Are There Levels of Consciousness? *Trends in Cognitive Sciences* **20**, 405–413 (2016).
40. U. Lee, *et al.*, Functional Brain Network Mechanism of Hypersensitivity in Chronic Pain. *Sci Rep* **8**, 243 (2018).
41. S. Blain-Moraes, *et al.*, Normal Brain Response to Propofol in Advance of Recovery from Unresponsive Wakefulness Syndrome. *Front. Hum. Neurosci.* **10** (2016).
42. A. Gramfort, *et al.*, MEG and EEG data analysis with MNE-Python. *Frontiers in Neuroscience* **7** (2013).
43. M. J. Prerau, R. E. Brown, M. T. Bianchi, J. M. Ellenbogen, P. L. Purdon, Sleep Neurophysiological Dynamics Through the Lens of Multitaper Spectral Analysis. *Physiology* **32**, 60–92 (2017).
44. R. Vallat, *raphaelvallat/antropy* (2022) (March 23, 2022).
45. JASP Team, JASP (Version 0.16.1)[Computer software] (2022).

## Figures and Tables

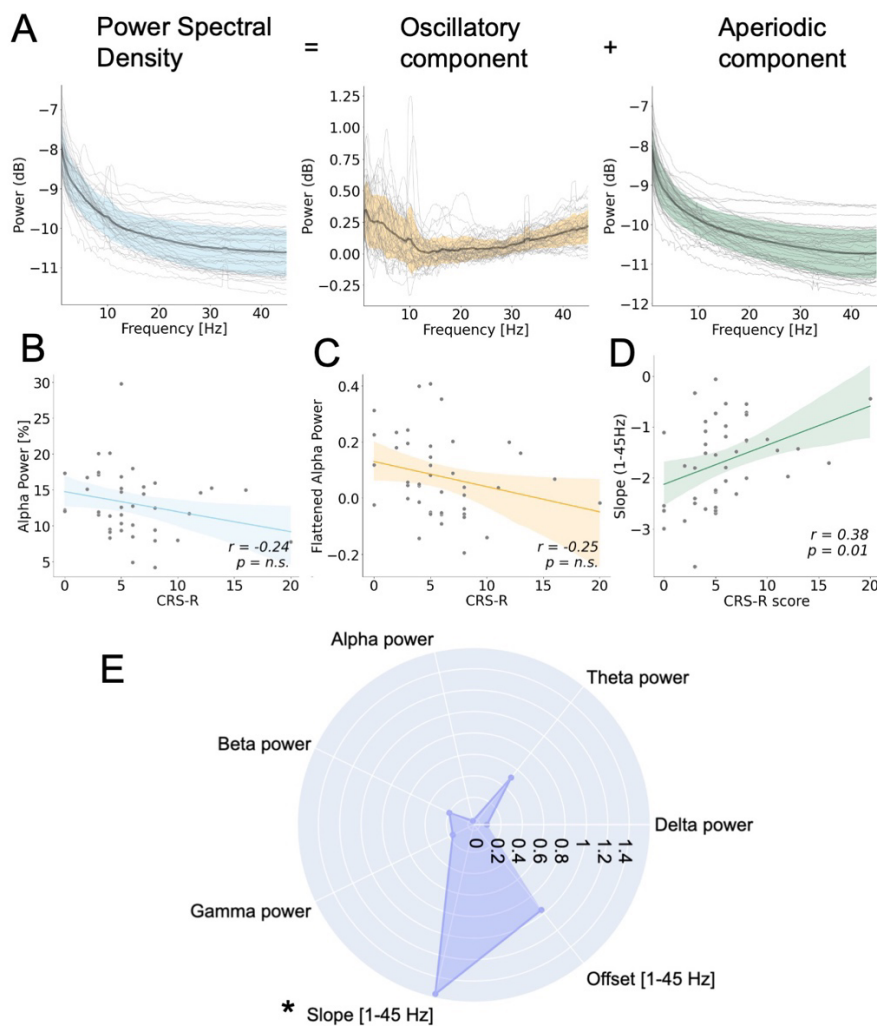

**Figure 1.** Diagnostic value of EEG spectral properties in DOC. **(A)** The power spectral density of individuals in DOC (blue) separates into an oscillatory component (orange) and an aperiodic component (green). Light grey lines represent individual subjects; darker lines represent the group average and standard deviation. **(B)** The traditional power analysis of oscillatory EEG in the alpha bandwidth does not correlate to individual's level of responsiveness, as measured by the CRS-R score. **(C)** After removal of the aperiodic component, remaining oscillatory power of the EEG in the alpha bandwidth does not correlate to individuals' level of responsiveness, as measured by the CRS-R score. **(D)** The aperiodic component of individuals EEG significantly correlates to individuals level of responsiveness. **(E)** Model coefficients after combining oscillatory and aperiodic features in multivariate linear regression model. Only the aperiodic slope is a significant predictor for individuals' level of responsiveness.

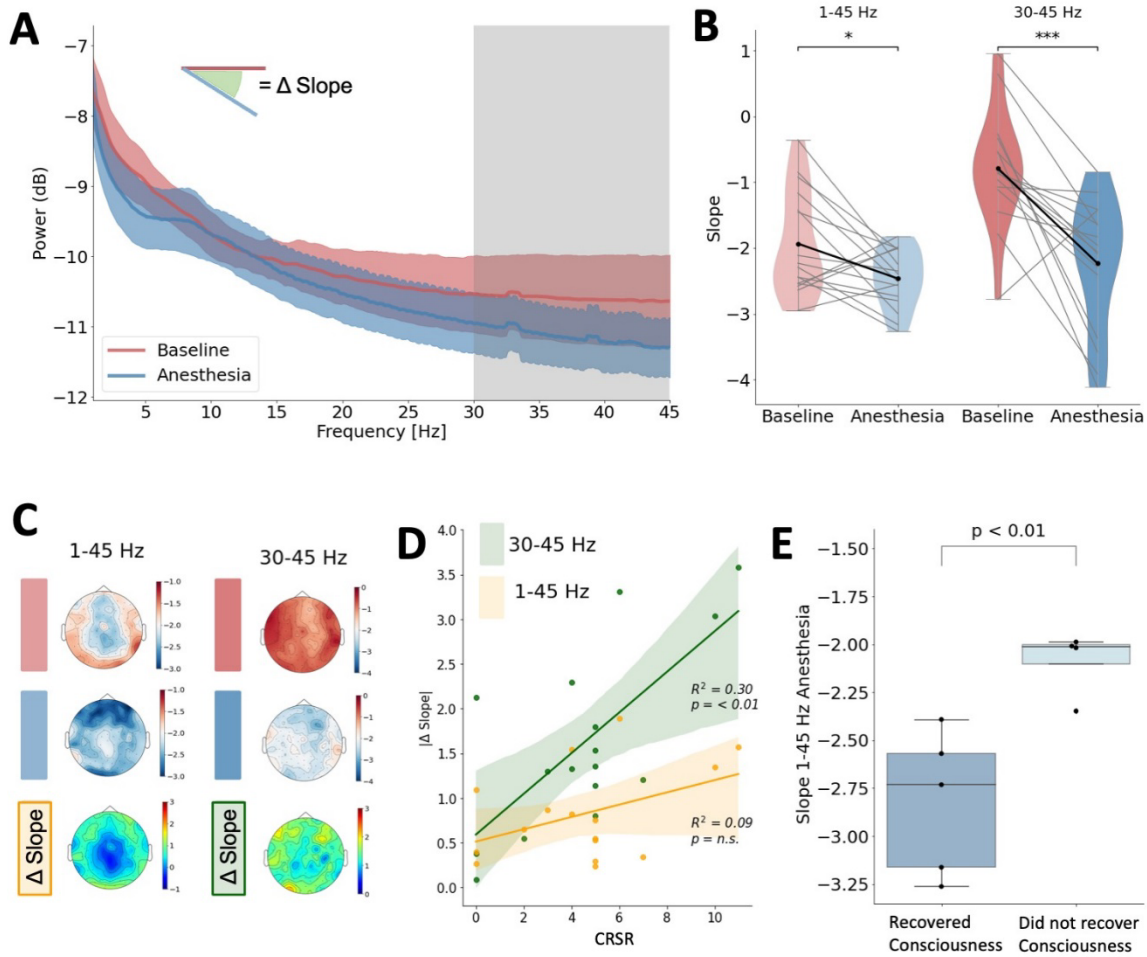

**Figure 2.** Alterations of the spectral slope in DOC and general anesthesia. **(A)** Power spectral density of Baseline (red) and Anesthesia state (blue), averaged across participants. **(B)** Change in spectral slope in response to propofol anesthesia in 1-45 Hz (left) and 30-45 Hz (right). **(C)** Group-averaged spatial distribution of the spectral slope at Baseline and Anesthesia state and the change in spectral slope ( $\Delta$  Slope). **(D)** The absolute change in spectral slope over all channels in the 30-45 Hz range correlates with participants' CRS-R score. **(E)** The spectral slope during anesthesia in the 1-45 Hz range differs between individuals who did and did not recover consciousness after DOC. Error bars represent standard errors.



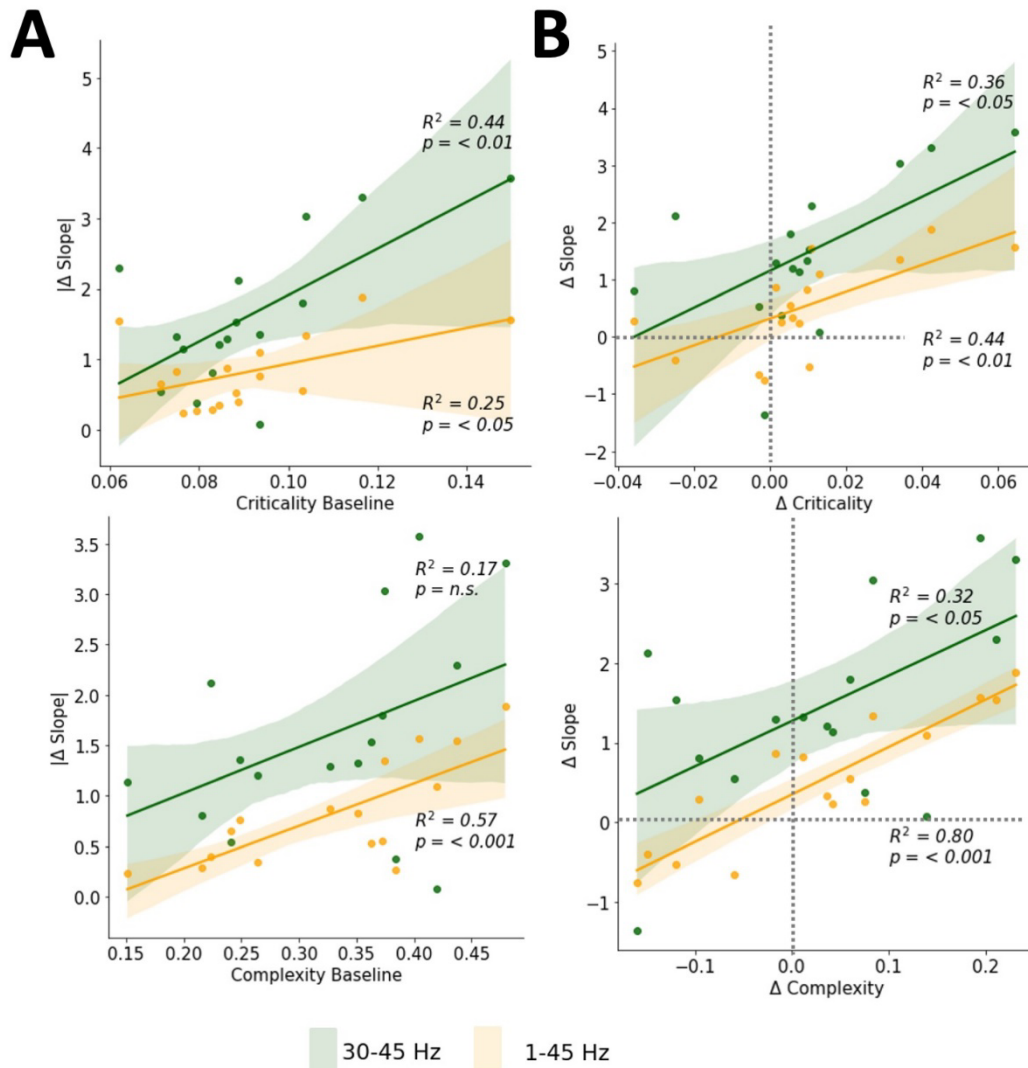

**Figure 3.** Relation between the spectral slope, signal complexity and network criticality in individuals with DOC **A)** The absolute anesthetic-induced change of spectral slope correlates with the pre-anesthetic criticality (top) and complexity (bottom). **B)** Propofol-induced change of spectral slope accompanies the brains propofol-induced changes in criticality (top) and complexity (bottom).

**Table 1.** Linear model with combined band-limited power and aperiodic features

| Coefficients            | b      | SE     | $\beta$ | t      | p            | 95% CI  |         |
|-------------------------|--------|--------|---------|--------|--------------|---------|---------|
|                         |        |        |         |        |              | Lower   | Upper   |
| <b>(Intercept)</b>      | 30.165 | 54.261 |         | 0.556  | 0.582        | -79.992 | 140.321 |
| <b>Age</b>              | -0.05  | 0.038  | -0.189  | -1.338 | 0.19         | -0.127  | 0.026   |
| <b>Slope [1-45 Hz]</b>  | 7.595  | 2.294  | 1.561   | 3.311  | <b>0.002</b> | 2.938   | 12.252  |
| <b>Offset [1-45 Hz]</b> | 2.869  | 1.632  | 0.96    | 1.758  | 0.087        | -0.444  | 6.181   |
| <b>Power Delta</b>      | 0.096  | 0.857  | 0.068   | 0.112  | 0.912        | -1.645  | 1.836   |
| <b>Power Theta</b>      | 0.526  | 0.457  | 0.506   | 1.152  | 0.257        | -0.402  | 1.454   |
| <b>Power Alpha</b>      | -0.019 | 0.442  | -0.022  | -0.043 | 0.966        | -0.916  | 0.878   |
| <b>Power Beta</b>       | 0.274  | 0.34   | 0.198   | 0.805  | 0.426        | -0.417  | 0.965   |
| <b>Power Gamma</b>      | 0.261  | 0.282  | 0.162   | 0.927  | 0.360        | -0.311  | 0.834   |

Note: Null model contained Age, SE: Standard Error
